# Supplementary material
Source: PubMed Central journal article supplement (PMC4381798)
Supplement: NIHMS666387-supplement-10549_2015_3311_MOESM1_ESM.pdf [file NIHMS666387-supplement-10549_2015_3311_MOESM1_ESM.pdf]

## **Antihypertensive Medication Use and Incident Breast Cancer in Women**

Elizabeth E. Devore, ScD<sup>1</sup>, Sung Kim<sup>2</sup>, Cody A. Ramin, ScM<sup>1,3</sup>, Lani R. Wegrzyn, MS<sup>4</sup>, Jennifer Massa, ScD<sup>5</sup>, Michelle D. Holmes, MD, DrPH<sup>1,4</sup>, Karin B. Michels, PhD<sup>1,4,6</sup>, Rulla M. Tamimi, ScD<sup>1,4</sup>, John P. Forman, MD<sup>7</sup>, Eva S. Schernhammer, MD, DrPH<sup>1,4,8</sup>

<sup>1</sup> Channing Division of Network Medicine, Department of Medicine, Brigham and Women's Hospital and Harvard Medical School, 181 Longwood Avenue, Boston, Massachusetts 02115

<sup>2</sup> Massachusetts College of Pharmacy and Health Sciences, 179 Longwood Avenue, Boston, Massachusetts 02115

<sup>3</sup> Department of Epidemiology, Johns Hopkins Bloomberg School of Public Health, Baltimore, 615 North Wolfe Street, Baltimore, Maryland 21205

<sup>4</sup> Department of Epidemiology, Harvard School of Public Health, 677 Huntington Avenue, Boston, Massachusetts 02115

<sup>5</sup> Department of Nutrition, Harvard School of Public Health, 665 Huntington Avenue, Boston, Massachusetts 02115

<sup>6</sup> Obstetrics and Gynecology Epidemiology Center, Department of Obstetrics, Gynecology and Reproductive Biology, Brigham and Women's Hospital, Harvard Medical School, 221 Longwood Avenue, Boston, Massachusetts 02115

<sup>7</sup> Renal Division, Brigham and Women's Hospital, 75 Francis Street, Boston, Massachusetts 02115

<sup>8</sup> Applied Cancer Research-Institution for Translational Research Vienna (ACR-ITR VIENNA), Bernardgasse 24/2, A-1070 Vienna, Austria

Corresponding author: Elizabeth E. Devore, 181 Longwood Avenue, Room 448, Boston, Massachusetts, 02115; phone: 617-525-2042; fax: 617-525-2008; email: [nheed@channing.harvard.edu](mailto:nheed@channing.harvard.edu)

Submitted to: Breast Cancer Research and Treatment

Online Resource 1. Relative risks of ER+ and ER- breast cancer over the follow-up period (1988-2012) in the Nurses' Health Study, according to current use of antihypertensive medication (n=94,233)

|                                                 | ER+ tumors      |                     | ER- tumors     |                     | P-heterogeneity <sup>a</sup> |
|-------------------------------------------------|-----------------|---------------------|----------------|---------------------|------------------------------|
|                                                 | Past/never use  | Current use         | Past/never use | Current use         |                              |
| Any antihypertensive medication                 |                 |                     |                |                     | 1.0                          |
| Cases/Person-years                              | 2,962/1,147,784 | 1,791/615,414       | 569/1,150,060  | 311/616,851         |                              |
| Age-adjusted RR (95% CI)                        | 1.00 (ref)      | 1.08 (1.02 to 1.15) | 1.00 (ref)     | 1.08 (0.94 to 1.25) |                              |
| Multivariable-adjusted RR (95% CI) <sup>b</sup> | 1.00 (ref)      | 1.00 (0.94 to 1.07) | 1.00 (ref)     | 1.02 (0.88 to 1.19) |                              |
| Diuretics                                       |                 |                     |                |                     | 0.6                          |
| Cases/Person-years                              | 3,976/1,496,152 | 776/266,897         | 738/1,499,226  | 142/267,535         |                              |
| Age-adjusted RR (95% CI)                        | 1.00 (ref)      | 1.07 (0.99 to 1.16) | 1.00 (ref)     | 1.16 (0.96 to 1.39) |                              |
| Multivariable-adjusted RR (95% CI) <sup>b</sup> | 1.00 (ref)      | 1.00 (0.92 to 1.08) | 1.00 (ref)     | 1.11 (0.92 to 1.34) |                              |
| Beta blockers                                   |                 |                     |                |                     | 0.02                         |
| Cases/Person-years                              | 4,064/1,526,609 | 688/236,440         | 784/1,529,755  | 96/237,006          |                              |
| Age-adjusted RR (95% CI)                        | 1.00 (ref)      | 1.06 (0.97 to 1.15) | 1.00 (ref)     | 0.81 (0.65 to 1.00) |                              |
| Multivariable-adjusted RR (95% CI) <sup>b</sup> | 1.00 (ref)      | 1.00 (0.92 to 1.09) | 1.00 (ref)     | 0.77 (0.62 to 0.96) |                              |
| Calcium channel blockers                        |                 |                     |                |                     | 0.1                          |
| Cases/Person-years                              | 4,300/1,619,742 | 452/143,306         | 786/1,623,104  | 94/143,657          |                              |
| Age-adjusted RR (95% CI)                        | 1.00 (ref)      | 1.13 (1.02 to 1.24) | 1.00 (ref)     | 1.41 (1.13 to 1.75) |                              |
| Multivariable-adjusted RR (95% CI) <sup>b</sup> | 1.00 (ref)      | 1.08 (0.98 to 1.20) | 1.00 (ref)     | 1.36 (1.09 to 1.70) |                              |
| ACE inhibitors                                  |                 |                     |                |                     | 0.8                          |
| Cases/Person-years                              | 4,379/1,624,767 | 374/138,432         | 814/1,628,176  | 66/138,735          |                              |
| Age-adjusted RR (95% CI)                        | 1.00 (ref)      | 0.94 (0.84 to 1.04) | 1.00 (ref)     | 0.98 (0.76 to 1.27) |                              |
| Multivariable-adjusted RR (95% CI) <sup>b</sup> | 1.00 (ref)      | 0.90 (0.81 to 1.00) | 1.00 (ref)     | 0.95 (0.73 to 1.23) |                              |

<sup>a</sup> P-heterogeneity calculated using the likelihood ratio test.

<sup>b</sup> These models are adjusted for age and body-mass index (<20, 20-21.9, 22-24.9, 25-29.9, ≥30 kg/m<sup>2</sup>), height (inches), oral contraceptive use (never, ever), menopausal status (premenopausal, postmenopausal), age at menopause (<45, 45-49, 50-52, ≥53 years), postmenopausal hormone use (among postmenopausal women only: never, past, current), parity and age at first birth (nulliparous, 1-2 children and <25 years old, 1-2 children and 25-29 years old, 1-2 children and ≥30 years old, ≥3 children and <25 years old, ≥3 children and ≥25 years old), age at menarche (<12, 12, 13, ≥14 years old), family history of breast cancer (yes, no), history of benign breast disease (yes, no), alcohol intake (none, 1-7.49, 7.5-14.99, 15-29.9, ≥30 grams/day), physical activity level (quintiles of MET-hours/week), smoking status (never or past, current and <25 cigarettes/day, current and ≥25 cigarettes/day), and shift work history (none, 1-9, ≥10 years).
